# Supplementary material for: Changes in Coding of Suicide Attempts or Self-Harm With Transition From ICD-9 to ICD-10
Source: Atypon-hosted journal article supplement (doi:10.1176/appi.ps.201600450), 2016-12-01

Appendix: Rates of Self-Harm and Events of Undetermined Intent Before and After the ICD-10 transition, by site

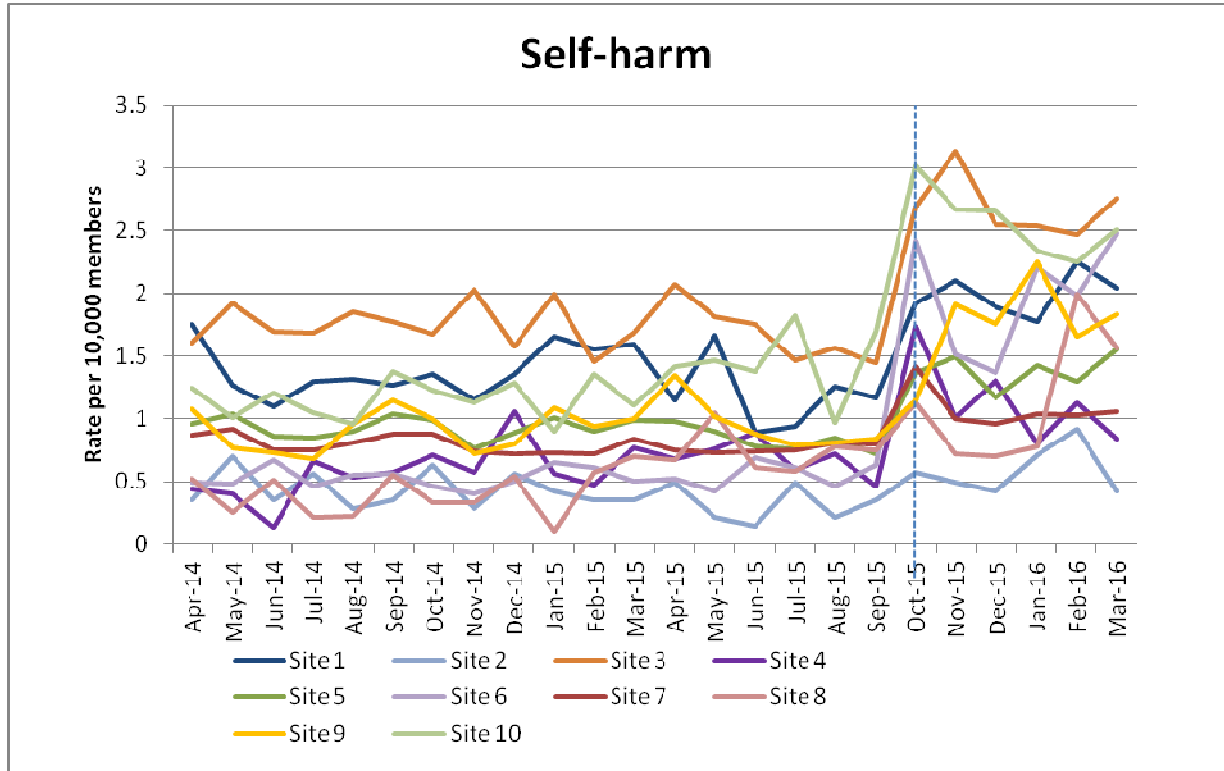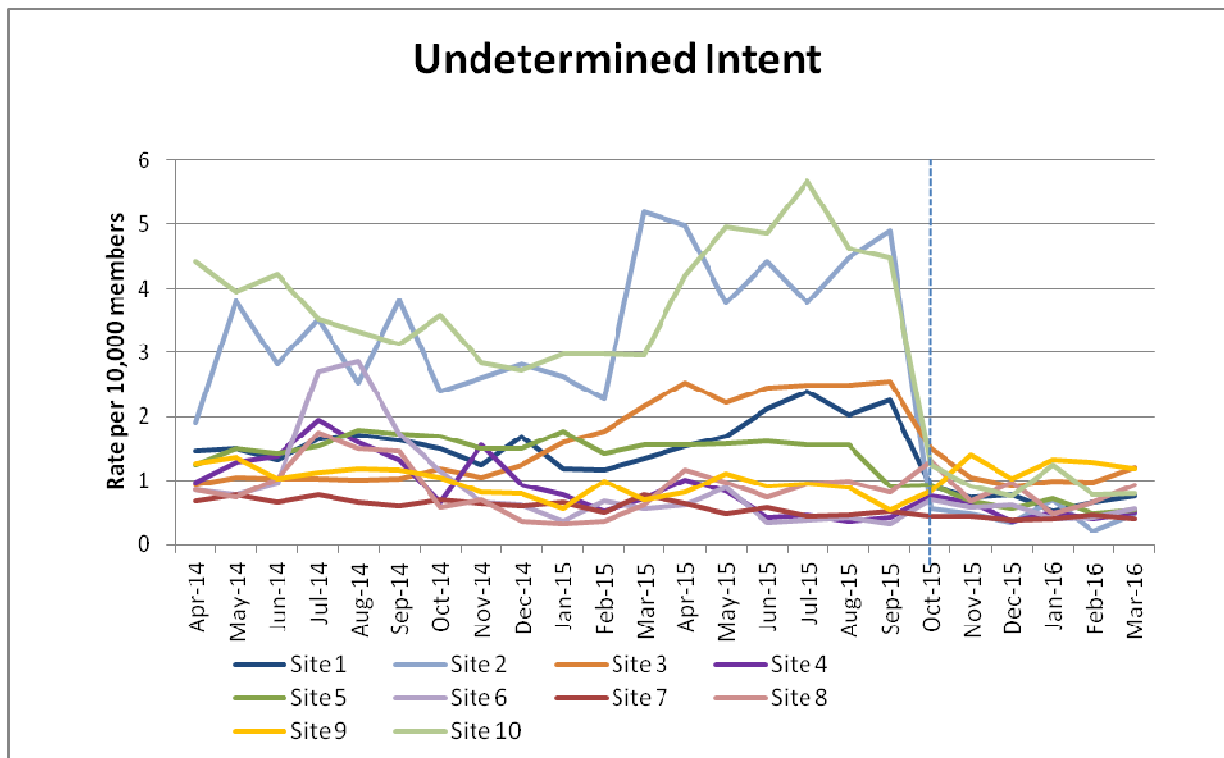

Supplement: appi.ps.201600450.ds001.pdf [file appi.ps.201600450.ds001.pdf]
